# Supplementary material for: Controlling Obesity and Metabolic Diseases by Hydrodynamic Delivery of a Fusion Gene of Exendin-4 and α1 Antitrypsin
Source: PubMed Central journal article supplement (PMC6748963; doi:10.1038/s41598-019-49757-y), 2019-09-17

**Controlling Obesity and Metabolic Diseases by Hydrodynamic Delivery of a  
Fusion Gene of Exendin-4 and  $\alpha$ 1-Antitrypsin**

Mingming Gao and Dexi Liu

**Supplementary Table 1. Primer sequences employed in q-PCR.**

| <b>Gene name</b>                | <b>Forward primer sequence (F)</b> | <b>Reverse primer sequence (R)</b> |
|---------------------------------|------------------------------------|------------------------------------|
| <i>Acc</i>                      | F: ATGGGCGGAATGGTCTCTTTT           | R: TGGGGACCTTGTCTTCATCAT           |
| <i>Acox</i>                     | F: CCGCCACCTTCAATCCAGAG            | R: CAA GT TCTCGATTCTCGACGG         |
| <i>Adrp</i>                     | F: GACCTTGTGTCTCCGCTTAT            | R: CAACCGCAATTTGTGGCTC             |
| <i>Atgl</i>                     | F: GGATGGCGGCATTTTCAGACA           | R: CAAAGGGTTGGGTTGGTTTCAG          |
| <i>Cd11b</i>                    | F: ATGGACGCTGATGGCAATACC           | R: TCCCCATTCACGTCTCCCA             |
| <i>Cd11c</i>                    | F: CTGGATAGCCTTTCTTCTGCTG          | R: GCACACTGTGTCCGAACTCA            |
| <i>Cd36</i>                     | F: ATGGGCTGTGATCGGAACTG            | R: GTCTTCCCAATAAGCATGTCTCC         |
| <i>Chrebp</i>                   | F: AGATGGAGAACCGACGTATCA           | R: ACTGAGCGTGCTGACAAGTC            |
| <i>Cidea</i>                    | F: TGACATTCATGGGATTGCAGAC          | R: GGCCAGTTGTGATGACTAAGAC          |
| <i>Cpt1a</i>                    | F: CTCGCCTGAGCCATGAAG              | R: CACCAGTGATGATGCCATTCT           |
| <i>Dgat1</i>                    | F: TCCGTCCAGGGTGGTAGTG             | R: TGAACAAAGAATCTTGCAGACG          |
| <i>Dgat2</i>                    | F: GCGCTACTTCCGAGACTACTT           | R: GGGCCTTATGCCAGGAACT             |
| <i>Dio2</i>                     | F: AATTATGCCTCGGAGAAGACCG          | R: GGCAGTTGCCTAGTGAAAGGT           |
| <i>Elovl3</i>                   | F: TTCTCACGCGGGTTAAAAATGG          | R: GAGCAACAGATAGACGACCAC           |
| <i>F4/80</i>                    | F: TGACTCACCTTGTGGTCTTAA           | R: CTTCCCAGAATCCAGTCTTTCC          |
| <i>Fabp4</i>                    | F: AAGGTGAAGAGCATCATAACCC          | R: TCACGCCTTTCATAACACATTCC         |
| <i>Fas</i>                      | F: GGAGGTGGTG ATAGCCGGTAT          | R: TGGGTAATCCATAGAGCCCAG           |
| <i>Fsp27</i>                    | F: ATGGACTACGCCATGAAGTCT           | R: CGGTGCTAACACGACAGGG             |
| <i>Fxr</i>                      | F: GCTTGATGTGCTACAAAAGCTG          | R: CGTGGTGATGGTTGAATGTCC           |
| <i>G6p</i>                      | F: CGACTCGCTATCTCCAAGTGA           | R: GTTGAACCAGTCTCCGACCA            |
| <i>Gapdh</i>                    | F: AGGTCGGTGTGAACGGATTTG           | R: TGTAGACCATGTAGTTGAGGTCA         |
| <i>Hsl</i>                      | F: CCAGCCTGAGGGCTTACTG             | R: CTCCATTGACTGTGACATCTCG          |
| <i>Il6</i>                      | F: TAGTCCTTCTACCCCAATTTCC          | R: TTGGTCCTTAGCCACTCCTTC           |
| <i>Lcad</i>                     | F: TCTTTTCTCGGAGCATGACA            | R: GACCTCTCTACTCACTTCTCCAG         |
| <i>Lpl</i>                      | F: GGGAGTTTGGCTCCAGAGTTT           | R: TGTGTCTTCAGGGGTCTTAG            |
| <i>Lxr</i>                      | F: CTCAATGCCTGATGTTTCTCCT          | R: TCCAACCCTATCCCTAAAGCAA          |
| <i>Mcad</i>                     | F: GGGTTTAGTTTTGAGTTGACGG          | R: CCCCCTTTTTGTCATATTCCG           |
| <i>Mcp1</i>                     | F: TTA AAAACCTGGATCGGAACCA         | R: GCATTAGCTTACAGATTTACGGGT        |
| <i>Mgat1</i>                    | F: TGGTGCCAGTTTGGTTCCAG            | R: TGCTCTGAGGTCGGGTTCA             |
| <i>Mgat2</i>                    | F: TGGGAGCGCAGGTTACAGA             | R: CAGGTGGCATAACAGGACAGA           |
| <i>Oxpat</i>                    | F: TGTCAGTGCTTACAACCTCGG           | R: CAGGGCACAGGTAGTCACAC            |
| <i>Pepck</i>                    | F: CTGCATAACGGTCTGGACTTC           | R: CAGCAACTGCCCGTACTCC             |
| <i>Pgc1a</i>                    | F: TATGGAGTGACATAGAGTGTGC          | R: CCACTTCA ATCCACCCAGAAAG         |
| <i>Plin1</i>                    | F: GGGACCTGTGAGTGCTTCC             | R: GTATTGAAGAGCCGGGATCTTTT         |
| <i>Ppara</i>                    | F: AGAGCCCCATCTGTCCTCTC            | R: ACTGGTAGTCTGCAAAACCAAA          |
| <i>Ppar<math>\gamma</math>1</i> | F: GGAAGACCACTCGCATTCTT            | R: GTAATCAGCAACCATTGGGTCA          |
| <i>Ppar<math>\gamma</math>2</i> | F: TCGCTGATGCACTGCCTATG            | R: GAGAGGTCCACAGAGCTGATT           |
| <i>Ppar<math>\delta</math></i>  | F: TCCATCGTCAACAAAGACGGG           | R: ACTTGGGCTCAATGATGTCAC           |
| <i>Scd</i>                      | F: TTCTTGCGATACTCTGGTGC            | R: CGGGATTGAATGTTCTTGTGCT          |
| <i>Srebp1c</i>                  | F: GCAGCCACCATCTAGCCTG             | R: CAGCAGTGAGTCTGCCTTGAT           |
| <i>Tnfa</i>                     | F: CCCTCACACTCAGATCATCTTC          | R: GCTACGACGTGGGCTACAG             |
| <i>Ucp1</i>                     | F: AGGCTTCCAGTACCATTAGGT           | R: CTGAGTGAGGCAAAGCTGATTT          |

Uncropped image for Figure 1B

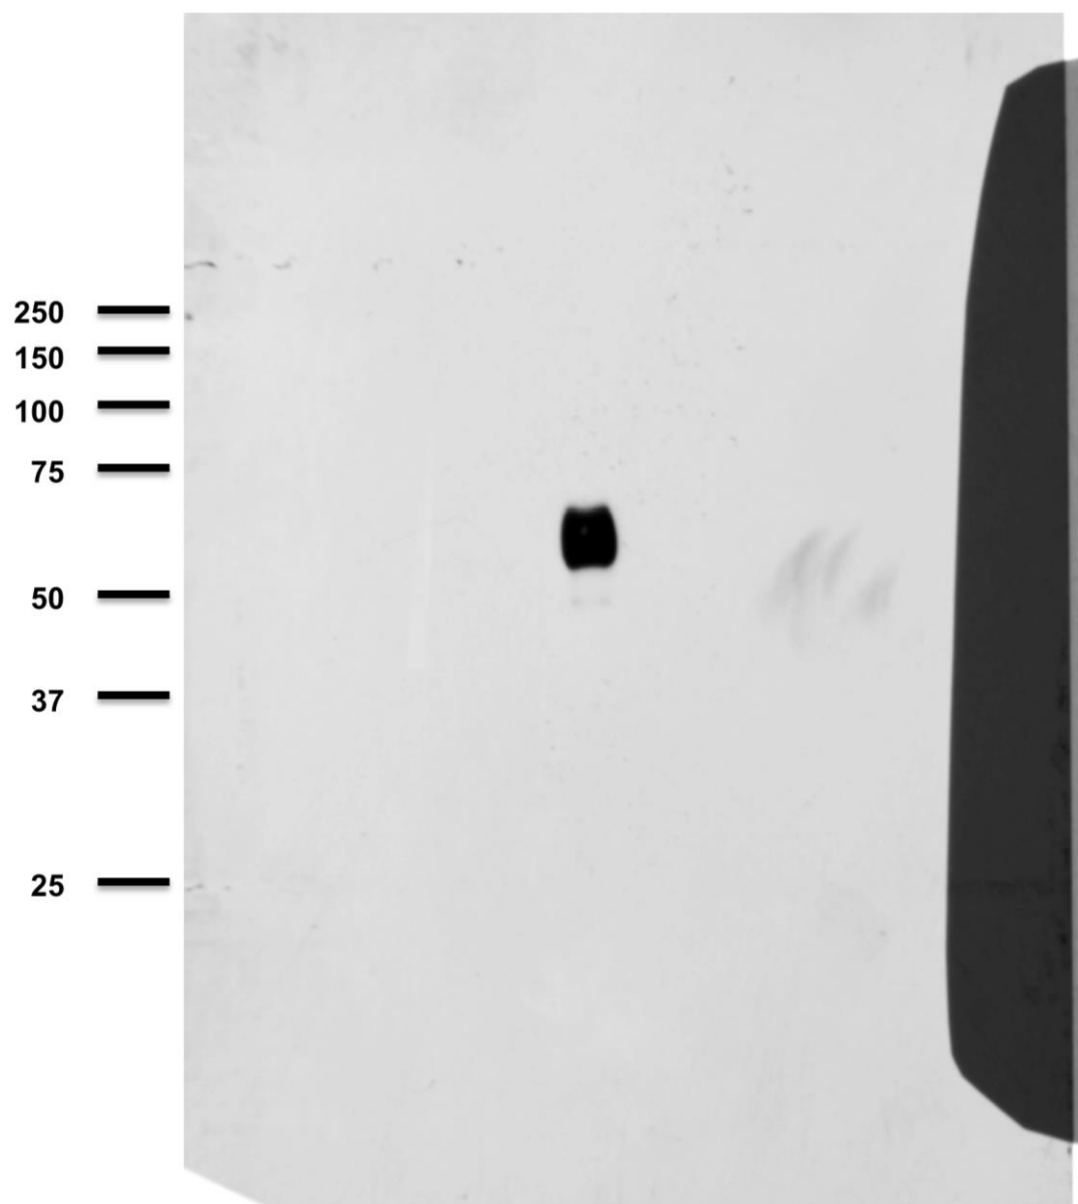

Supplement: 41598_2019_49757_MOESM1_ESM.pdf [file 41598_2019_49757_MOESM1_ESM.pdf]
